# Supplementary material for: A preliminary study of a 68Ga-labeled PET probe for HER2 imaging
Source: Royal Society of Chemistry journal article supplement (doi:10.1039/d3nj02050a), 2023-01-01
Supplement: d3nj02050a1.pdf [file d3nj02050a1.pdf]

## A preliminary study of a $^{68}\text{Ga}$ -labeled PET probe for HER2 imaging

Kaiwen Chen<sup>a,f</sup>, Xiangwei Wang<sup>a,b,c,d,e</sup>, Xiaoping Xu<sup>a,b,c,d,e\*</sup>, Xiao Wang<sup>a,f</sup>, Simin He<sup>a,b,c,d,e</sup>,

Jianping Zhang<sup>a,b,c,d,e</sup>, Yuyun Sun<sup>a,b,c,d,e</sup>, Shiping Yang<sup>f</sup>, Shaoli Song<sup>a,b,c,d,e\*</sup>

a. Department of Nuclear Medicine, Fudan University Shanghai Cancer Center, Shanghai, China 200032

b. Department of Oncology, Shanghai Medical College, Fudan University, Shanghai, China 200032

c. Center for Biomedical Imaging, Fudan University, Shanghai, China 200032

d. Shanghai Engineering Research Center of Molecular Imaging Probes, Shanghai, China 200032

e. Department of Nuclear Medicine, Shanghai Proton and Heavy Ion Center, Shanghai, China 201321

f. College of Chemistry and Materials Science, Shanghai Normal University, Shanghai, China 200234

### Corresponding author:

1. Shaoli Song Ph.D (shaoli-song@163.com)

2. Xiaoping Xu Ph.D (xyp0012@ustc.edu)

Address: No.270, Dong'an Road, Xuhui District, Shanghai, China.

Telephone: +86-21-64175590-83305 Fax: +86-21-64176650

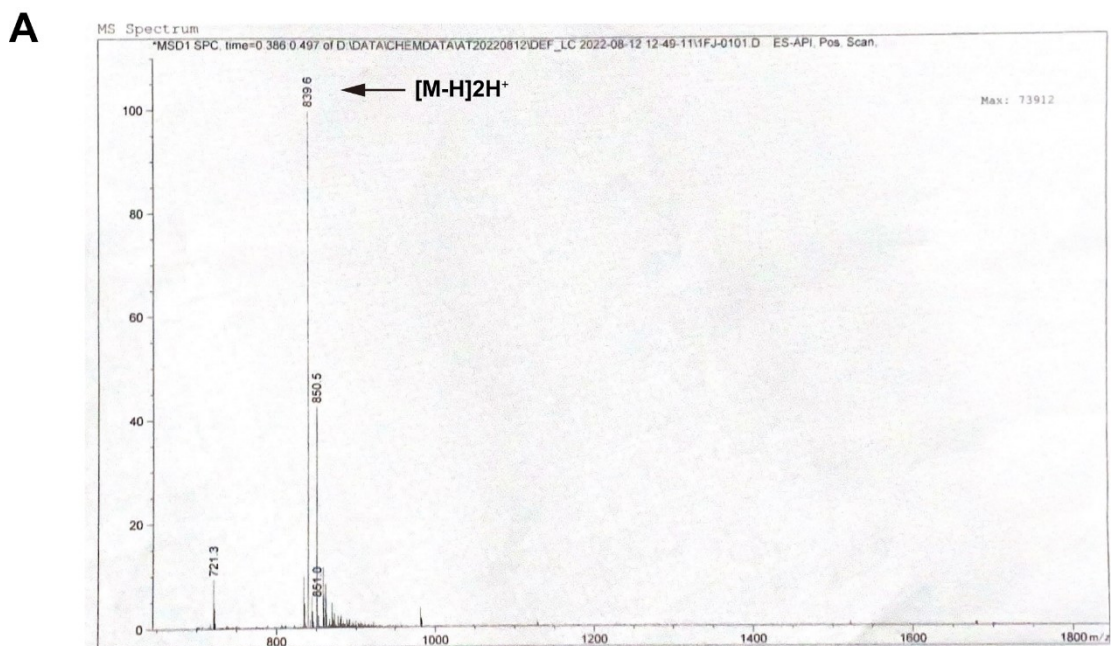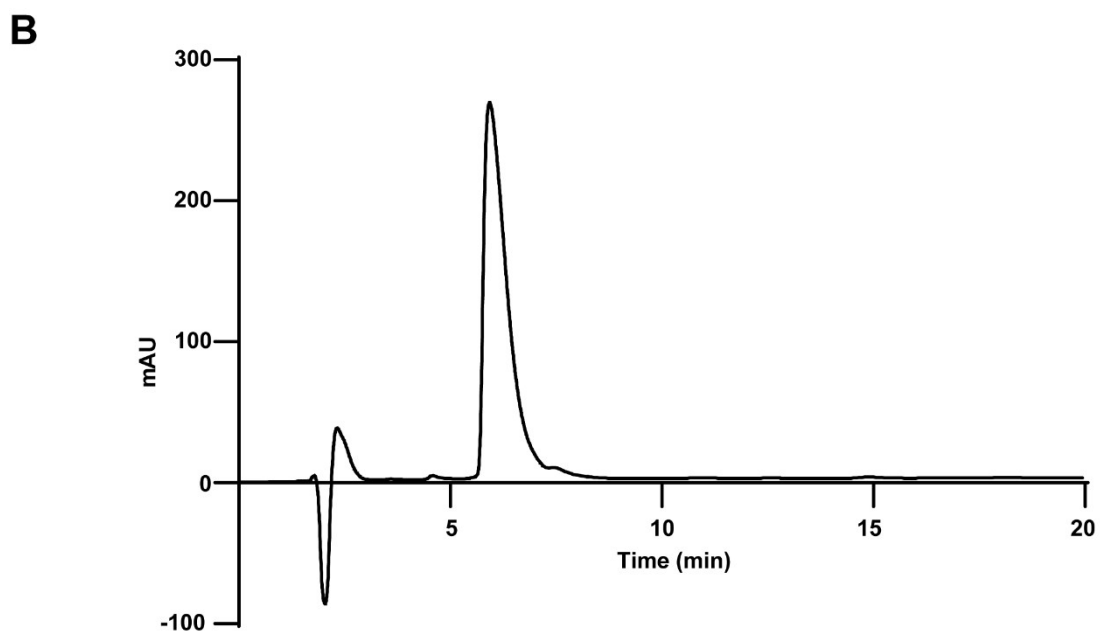

**Fig. S1.** (A) ESI analysis of DOTA-GGG-H6F, MS-ESI(+) calcd for  $C_{80}H_{112}N_{18}O_{22}$ : 1676.8199,  $[M-H]2H^+$  found: 839.6. (B) Analytical HPLC chromatogram of DOTA-GGG-H6F (retention time: 5.9 min).

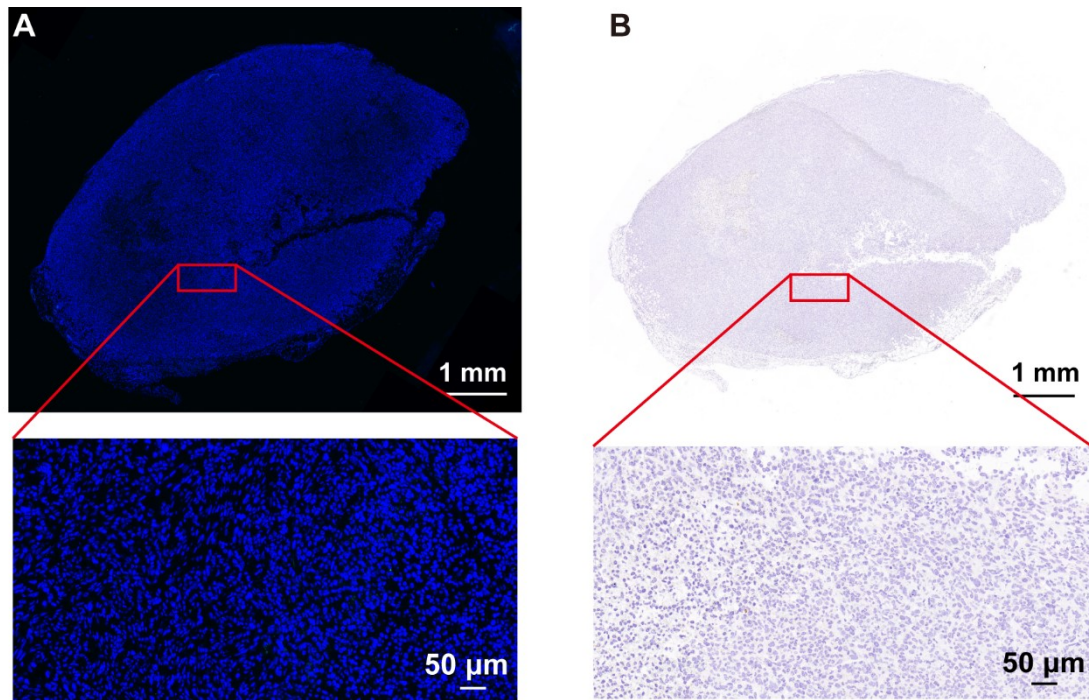

**Fig. S2.** Histological studies. (A) IF (green = HER2, blue = nuclei), and (B) IHC analysis of MDA-MB-231 tumor tissue specimens harvested at 60 min post-injection.

**Table. S1.** Biodistribution of <sup>68</sup>Ga-DOTA-GGG-H6F tumor xenograft models.

| Tissue    | SKOV-3      |             |              | MDA-MB-231      |             |
|-----------|-------------|-------------|--------------|-----------------|-------------|
|           | 30 min      | 60 min      | 120 min      | 60 min<br>Block | 60 min      |
| Blood     | 1.20 ± 0.45 | 0.31 ± 0.08 | 0.11 ± 0.01  | 0.40 ± 0.07     | 0.41 ± 0.11 |
| Heart     | 0.33 ± 0.11 | 0.10 ± 0.02 | 0.06 ± 0.02  | 0.09 ± 0.02     | 0.12 ± 0.04 |
| Liver     | 0.85 ± 0.26 | 0.68 ± 0.21 | 0.77 ± 0.11  | 0.76 ± 0.26     | 0.63 ± 0.11 |
| Spleen    | 0.41 ± 0.16 | 0.28 ± 0.08 | 0.35 ± 0.22  | 0.30 ± 0.14     | 0.52 ± 0.20 |
| Lung      | 1.68 ± 0.88 | 0.80 ± 0.33 | 1.04 ± 0.51  | 0.55 ± 0.17     | 1.74 ± 0.62 |
| Kidney    | 5.53 ± 1.82 | 2.42 ± 0.86 | 1.62 ± 0.25  | 2.04 ± 0.45     | 2.96 ± 0.64 |
| Bladder   | 1.91 ± 0.77 | 0.69 ± 0.30 | 0.24 ± 0.10  | 0.99 ± 0.45     | 2.80 ± 1.06 |
| Brain     | 0.07 ± 0.02 | 0.04 ± 0.01 | 0.02 ± 0.01  | 0.03 ± 0.01     | 0.02 ± 0.01 |
| Intestine | 0.32 ± 0.06 | 0.18 ± 0.06 | 0.07 ± 0.04  | 0.19 ± 0.08     | 0.40 ± 0.31 |
| Stomach   | 0.52 ± 0.06 | 0.14 ± 0.02 | 0.04 ± 0.03  | 0.16 ± 0.02     | 0.18 ± 0.13 |
| Bone      | 0.37 ± 0.19 | 0.20 ± 0.10 | 0.13 ± 0.06  | 0.20 ± 0.16     | 0.38 ± 0.04 |
| Muscle    | 0.31 ± 0.03 | 0.06 ± 0.02 | 0.04 ± 0.005 | 0.07 ± 0.005    | 0.09 ± 0.01 |
| Tumor     | 1.07 ± 0.14 | 0.52 ± 0.10 | 0.23 ± 0.01  | 0.23 ± 0.03     | 0.36 ± 0.04 |
| T/M       | 3.44 ± 0.17 | 9.29 ± 1.90 | 6.40 ± 1.16  | 3.25 ± 0.32     | 4.01 ± 0.53 |

\* Values are expressed as mean ± SD (% ID/g); T/M = tumor to muscle ratio.
